# Supplementary material
Source: publisher figshare collection journal article supplement (https://acs.figshare.com/ndownloader/files/15320183)
Supplement: Supplementary file 1 [file 15320183]

# **Supporting information for**

## **Extremely efficient decomposition of ammonia-N to N<sub>2</sub> using ClO• from reactions of HO• and HOCl generated in situ on a novel bifacial photo-electroanode**

**Yan Zhang <sup>a</sup>, Jinhua Li <sup>a</sup>, Jing Bai <sup>a\*</sup>, Linsen Li <sup>a</sup>, Shuai Chen <sup>a</sup>, Tingsheng Zhou <sup>a</sup>, Jiachen Wang <sup>a</sup>, Ligang Xia <sup>b</sup>, Qunjie Xu <sup>b,c</sup>, Baoxue Zhou <sup>a,c,d\*</sup>**

<sup>a</sup>School of Environmental Science and Engineering, Shanghai Jiao Tong University, No. 800, Dongchuan Rd, Shanghai 200240, PR China.

<sup>b</sup>College of Environmental and Chemical Engineering, Shanghai University of Electric Power, No.2588 Changyang Road, Shanghai, 200090, PR China.

<sup>c</sup>Shanghai Institute of Pollution Control and Ecological Security, Shanghai, 200092, PR China.

<sup>d</sup>Key Laboratory of Thin Film and Microfabrication Technology, Ministry of Education, Shanghai 200240, PR China.

| <b>Contents</b>                                                                               | <b>Page</b> |
|-----------------------------------------------------------------------------------------------|-------------|
| Preparation of WO <sub>3</sub> photoanode.                                                    | S3          |
| Analytical Methods.                                                                           | S3          |
| Determination of the second-order rate constants                                              | S3          |
| Figure S1 Schematic illustration of the preparation of Sb-SnO <sub>2</sub> /WO <sub>3</sub> . | S4          |
| Figure S2 XRD patterns of Sb-SnO <sub>2</sub> /FTO.                                           | S5          |
| Figure S3 SEM views of the WO <sub>3</sub> layer                                              | S5          |
| Figure S4 LSV curves of the WO <sub>3</sub> and WO <sub>3</sub> /Sb-SnO <sub>2</sub> anodes   | S6          |

---

\* Corresponding authors at: School of Environmental Science and Engineering, Shanghai Jiao Tong University, Shanghai 200240, PR China  
E-mail addresses: [zhoubaoxue@sjtu.edu.cn](mailto:zhoubaoxue@sjtu.edu.cn) (B.X. Zhou); [bai\\_jing@sjtu.edu.cn](mailto:bai_jing@sjtu.edu.cn) (J. Bai)

|            |                                                                                                                      |     |
|------------|----------------------------------------------------------------------------------------------------------------------|-----|
| Figure S5  | Photoelectrochemical characterization of Sb-SnO <sub>2</sub> /WO <sub>3</sub>                                        | S6  |
| Figure S6  | Degradation of NH <sub>4</sub> <sup>+</sup> -N by HClO in presence of WO <sub>3</sub>                                | S7  |
| Figure S7  | NH <sub>4</sub> <sup>+</sup> -N degradation using Sb-SnO <sub>2</sub> /WO <sub>3</sub> in 50 mM NaHCO <sub>3</sub> . | S7  |
| Figure S8  | Ln(C/C <sub>0</sub> ) versus time for NB, BA and DMOB degradation.                                                   | S8  |
| Figure S9  | Model simulated radical concentration in DMOB degradation.                                                           | S9  |
| Figure S10 | Rate constants of NH <sub>4</sub> <sup>+</sup> reacting with ClO•, Cl• and OH•.                                      | S9  |
| Figure S11 | Effect of potential NH <sub>4</sub> <sup>+</sup> -N removal and NO <sub>3</sub> <sup>-</sup> -N generation.          | S10 |
| Figure S12 | Effects of pH on NH <sub>4</sub> <sup>+</sup> -N removal and NO <sub>3</sub> <sup>-</sup> -N generation.             | S10 |
| Figure S13 | SEM of Sb-SnO <sub>2</sub> prepared with different SnO <sub>2</sub> dosages.                                         | S11 |
| Figure S14 | Polarization curve of Sb-SnO <sub>2</sub> /FTO electrode.                                                            | S12 |
| Figure S15 | Effect of initial concentration on NH <sub>4</sub> <sup>+</sup> -N removal.                                          | S12 |
| Figure S16 | Formation of chlorate as functions of reaction times.                                                                | S13 |
| Figure S17 | NH <sub>4</sub> <sup>+</sup> -N removal in Sb-SnO <sub>2</sub> /WO <sub>3</sub> system during five tests.            | S13 |
| Figure S18 | SEM images of Sb-SnO <sub>2</sub> /WO <sub>3</sub> before and after reaction.                                        | S14 |
| Figure S19 | Current efficiency and energy consumption as a function of Potential.                                                | S14 |
| Figure S20 | Performance Sb-SnO <sub>2</sub> /WO <sub>3</sub> for degrading real wastewater.                                      | S15 |
| Figure S21 | Illustration of the mechanism in exhaustive denitrification system.                                                  | S16 |
| Figure S22 | The TN removal in Sb-SnO <sub>2</sub> /WO <sub>3</sub> and WO <sub>3</sub> electrode with Pd-Cu/NF as cathode.       | S16 |
| Table S1   | Second-order rate constants of reaction in the model.                                                                | S17 |
| Table S2   | Rate constants of scavengers reacting with different radicals.                                                       | S17 |
| Table S3   | The main characteristics of the real wastewater.                                                                     | S18 |

## 1. Preparation of WO<sub>3</sub> photoanode

In a typical synthesis, 1 g of ammonium paratungstate was dissolved in 93 ml deionized water. 2 mL of concentrated HCl was added to the above solution and stirred. Then 4 ml of H<sub>2</sub>O<sub>2</sub> (30%) was added and stirred vigorously for 1 h to dissolve the tungstic acid. Finally, the as-prepared solution was transferred into a 100 mL Teflon-lined stainless autoclave. The FTO substrates were cleaned with ultra-sonication for 15 min in acetone, methanol, and deionized water sequentially. After drying in an N<sub>2</sub> stream, they were placed in a stainless steel autoclave with the conducting side facing down. The autoclave was subjected to heat treatment at 160°C for 4 h, after which it was cooled to room temperature. The as-synthesized samples were rinsed with a copious amount of deionized water and followed by annealing at 500°C for 120 min.

## 2. Analytical Methods.

NB, BA and DMOB were quantified by HPLC (LC-20AT, Japan) coupled with C-18 column (4.6 mm ×150 mm, 5 µm particle size). The mobile phase consisted of water solution (pH 2, adjusted by phosphoric acid) and methanol solution (20:80, v%) at a flow rate of 1.0 mL/min. The concentrations of NB, BA and DMOB were quantified at 266 nm, 227 nm and 230 nm, respectively.

## 3. Determination of the second-order rate constants between HO•, Cl• and NH<sub>4</sub><sup>+</sup>

The second-order rate constants for the reaction of HO• with NH<sub>4</sub><sup>+</sup> were determined using NB as a reference compound, which reacts with HO• at a second-order rate constant of 3.9×10<sup>9</sup> M<sup>-1</sup> s<sup>-1</sup>. The reaction solution was spiked with the mixture of 2 mM NH<sub>4</sub><sup>+</sup> and 2 mM NB. The second-order rate constants was calculated from **Eq. S1**.

$$\ln \left( \frac{[NH_4^+]_0}{[NH_4^+]} \right) = \frac{K_{HO\bullet, NH_4^+}}{K_{HO\bullet, NB}} \times \ln \left( \frac{[NB]_0}{[NB]} \right) \quad (s1)$$

The second-order rate constants for the reaction of  $\text{Cl}\cdot$  with  $\text{NH}_4^+$  were measured using BA as a reference compound. The solution contained 50 mM  $\text{Cl}^-$ . BA can react with  $\text{ClO}\cdot$  rapidly with rate constants of  $1.8 \times 10^{10} \text{ M}^{-1} \text{ S}^{-1}$ . BA and  $\text{NH}_4^+$  were added into the system at concentrations of 2 mM. NB (10 mM) was used to scavenge the  $\text{HO}\cdot$  in the system.

$$\ln \left( \frac{[\text{NH}_4^+]_0}{[\text{NH}_4^+]} \right) = \frac{K_{\text{Cl}\cdot, \text{NH}_4^+}}{K_{\text{Cl}\cdot, \text{NB}}} \times \ln \left( \frac{[\text{BA}]_0}{[\text{BA}]} \right) \quad (\text{s2})$$

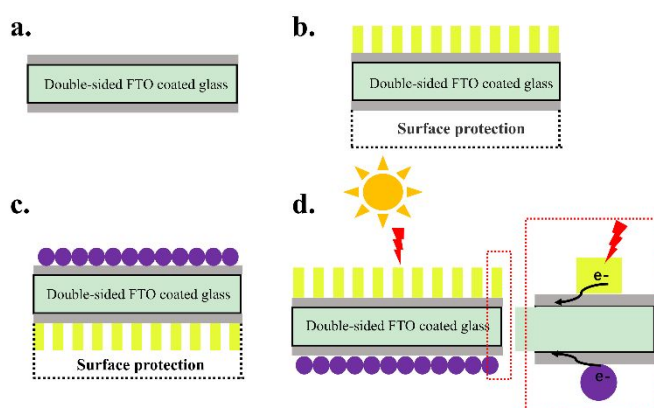

**Figure S1** Schematic illustration of the preparation of Sb-SnO<sub>2</sub>/WO<sub>3</sub>.

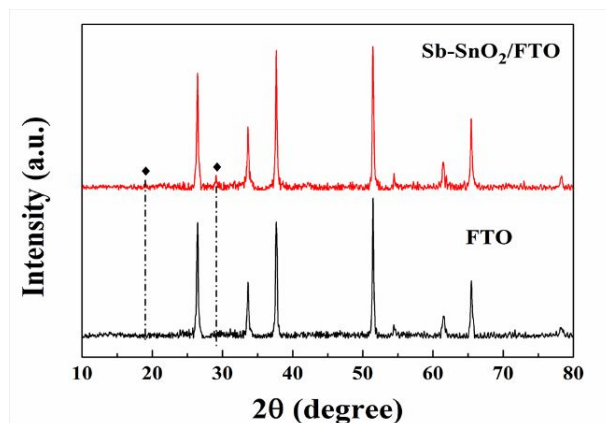

**Figure S2** XRD patterns of Sb-SnO<sub>2</sub>/FTO.

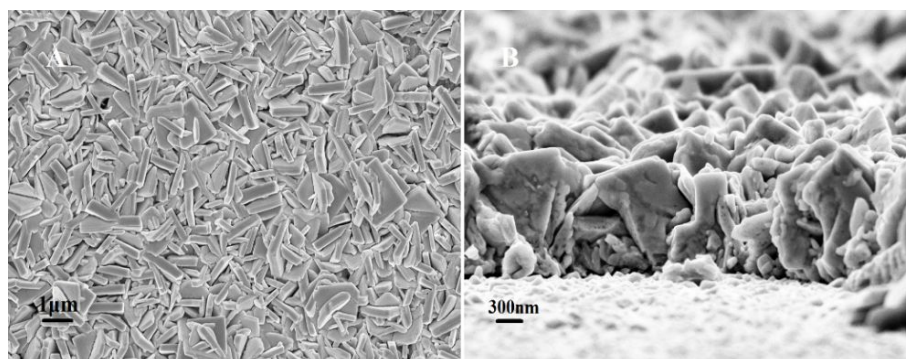

**Figure S3** (A) top views of the WO<sub>3</sub> layer (B) cross-sectional views of the WO<sub>3</sub> layer.

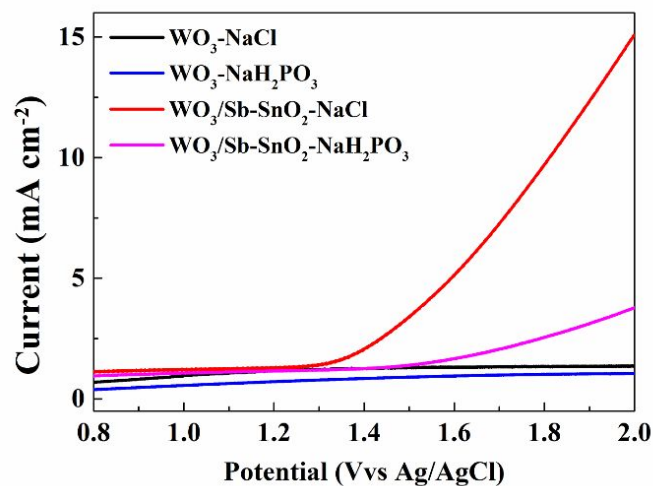

**Figure S4** LSV curves of the  $\text{WO}_3$  and  $\text{WO}_3/\text{Sb-SnO}_2$  anodes in  $\text{NaCl}$  and  $\text{NaH}_2\text{PO}_4$  solutions.

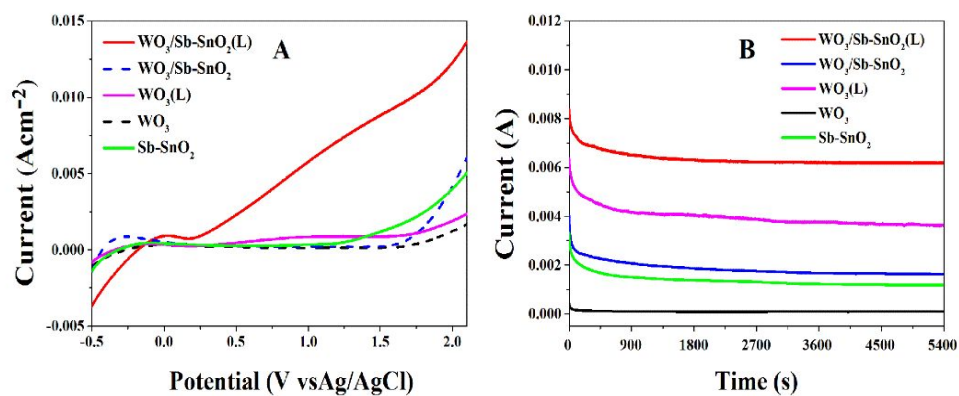

**Figure S5** Photoelectrochemical characterization of electrodes in 50 mM  $\text{NaCl}$ . (A) LSV obtained at a scan rate of  $0.05 \text{ V s}^{-1}$ . (B) Time profiles of current generation at 1.7 V, respectively. L refers to irradiation.

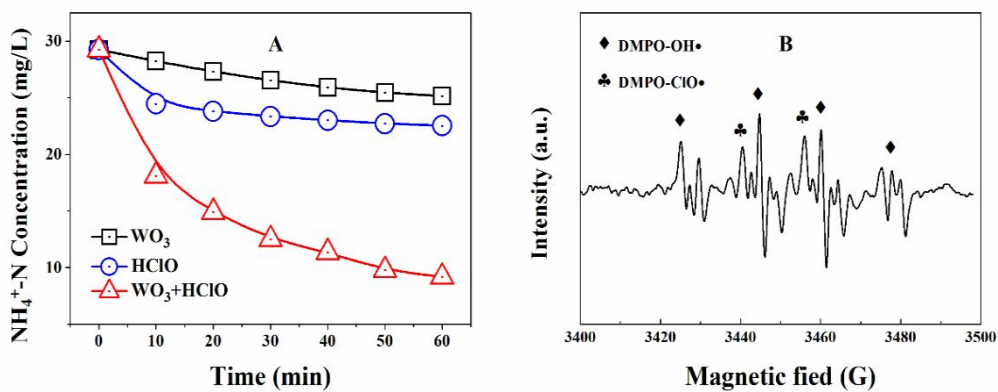

**Figure S6** (A) the degradation of  $\text{NH}_4^+\text{-N}$  by  $\text{HClO}$  in different system. (B) ESR spectra of  $\text{DMPO-OH}\cdot$  and  $\text{DMPO-ClO}\cdot$  in this  $\text{WO}_3/\text{HClO}$  system. Conditions: potential 1.7 V vs  $\text{Ag/AgCl}$ ,  $30 \text{ mg L}^{-1} \text{ NH}_4^+\text{-N}$ ,  $\text{pH}=5$ ,  $\text{NaClO}=0.5 \text{ g L}^{-1}$  (calculated by free chlorine).

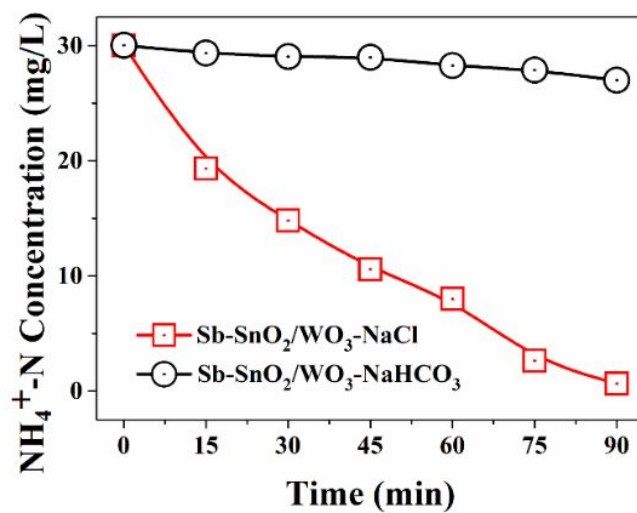

**Figure S7**  $\text{NH}_4^+\text{-N}$  degradation using the  $\text{Sb-SnO}_2/\text{WO}_3$  in 50 mM  $\text{NaCl}$  and 50 mM  $\text{NaHCO}_3$  at 1.7 V vs  $\text{Ag/AgCl}$ .

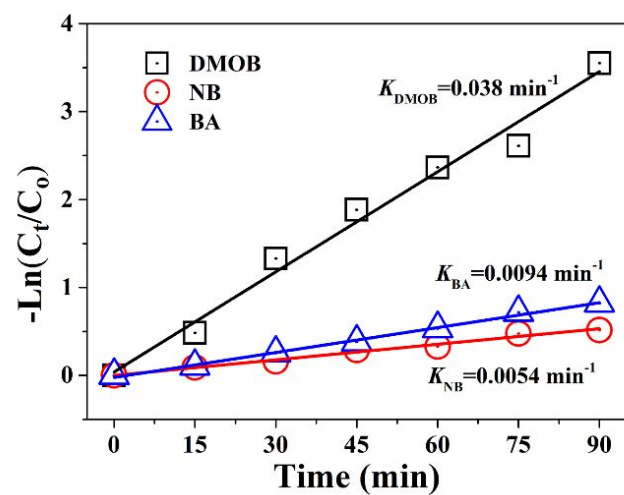

**Figure S8** The plots of  $\ln(C/C_0)$  versus time for the NB, BA and DMOB degradation.



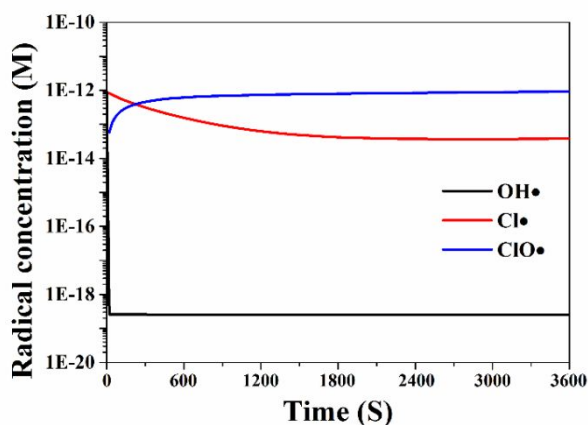

**Figure S9** Model simulated radical concentration in DMOB degradation on the Sb-SnO<sub>2</sub>/WO<sub>3</sub> operated under 1.7 V vs Ag/AgCl.

In this model, the pH was held constant at 5.0 and the initial NaCl concentration was 0.05M. The concentrations of radical species were calculated during the 60 min reaction time.

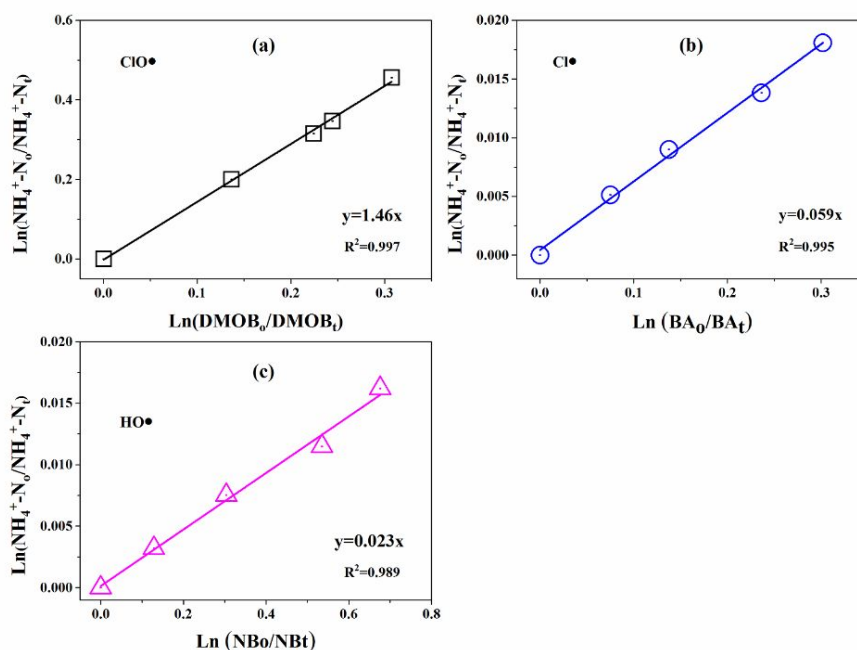

**Figure S10** Determination of the second-order rate constants of NH<sub>4</sub><sup>+</sup> reacting with (a) ClO• (b) Cl• and (c) OH• by competition kinetics using DMOB, BA and NB as reference compounds.

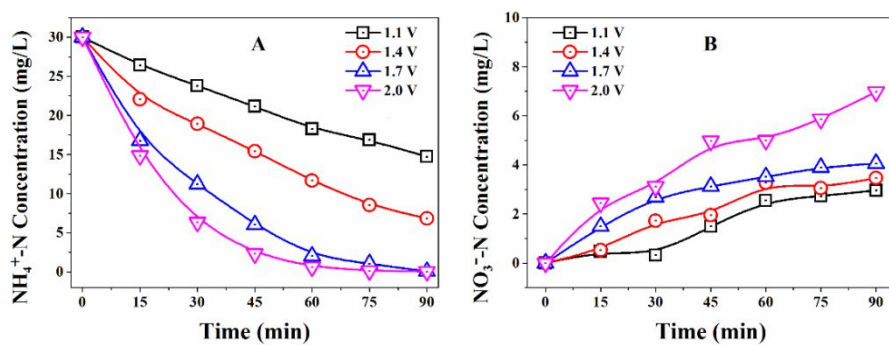

**Figure S11** Effect of applied potential on (A)  $\text{NH}_4^+\text{-N}$  removal and (B)  $\text{NO}_3^-\text{-N}$  generation.

Condition: NaCl 50 mM, pH=5, 30 mg L<sup>-1</sup>  $\text{NH}_4^+\text{-N}$ .

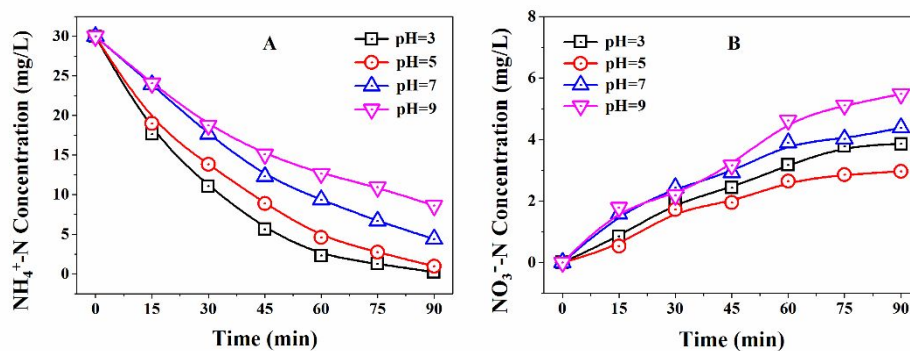

**Figure S12** Effects of pH on (A)  $\text{NH}_4^+\text{-N}$  removal and (B)  $\text{NO}_3^-\text{-N}$  generation. Condition: NaCl

50 mM, 30 mg L<sup>-1</sup>  $\text{NH}_4^+\text{-N}$ .

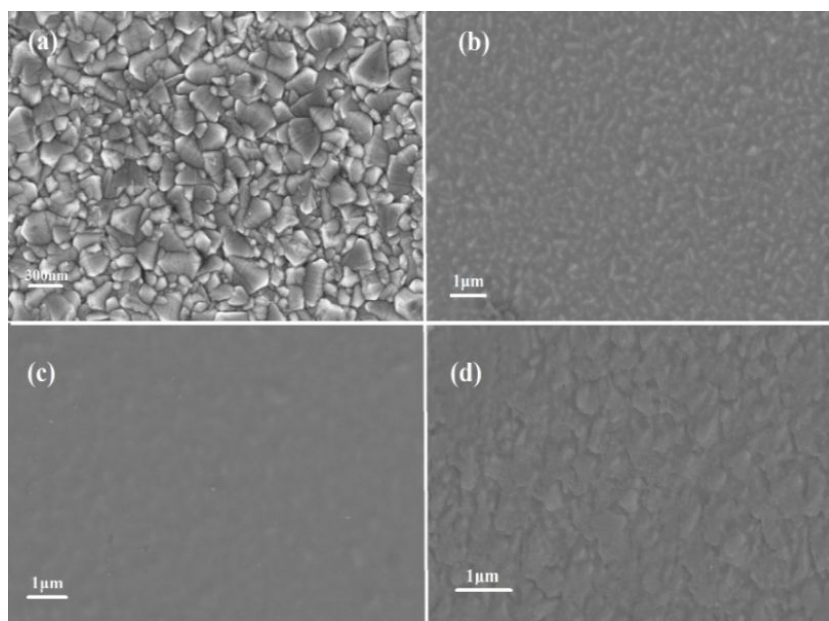

**Figure S13** SEM images of Sb-SnO<sub>2</sub>/FTO electrode prepared with different SnO<sub>2</sub> dosages of 0 layers (a), 2 layers (b), 6 layers (c), and 10 layers (d).

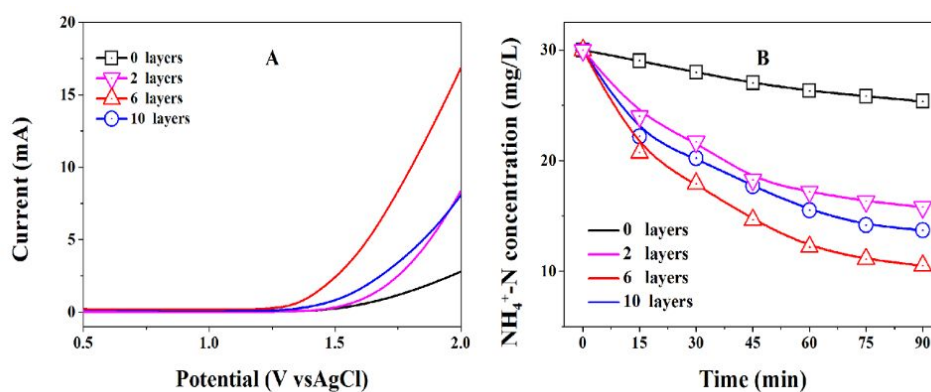

**Figure S14** Polarization curve of Sb-SnO<sub>2</sub>/FTO electrode (A) and the change of NH<sub>4</sub><sup>+</sup>-N concentration in electrochemical degradation (B). Condition: pH=5, 50 mM NaCl, 1.7 V vs Ag/AgCl.

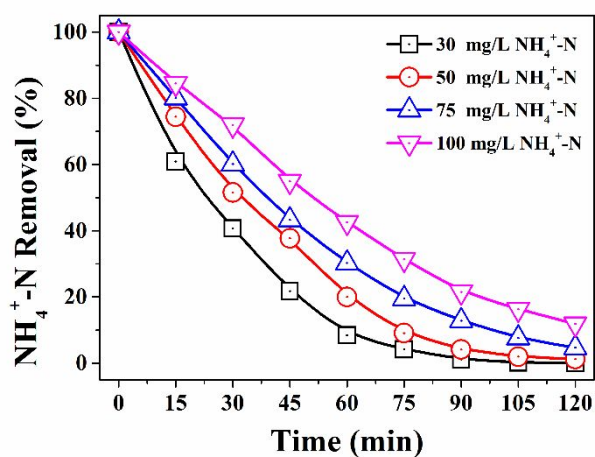

**Figure S15** Effect of NH<sub>4</sub><sup>+</sup>-N initial concentration on the NH<sub>4</sub><sup>+</sup>-N removal efficiencies. Condition: pH=5, potential 1.7 V vs Ag/AgCl, NaCl 50 mM.

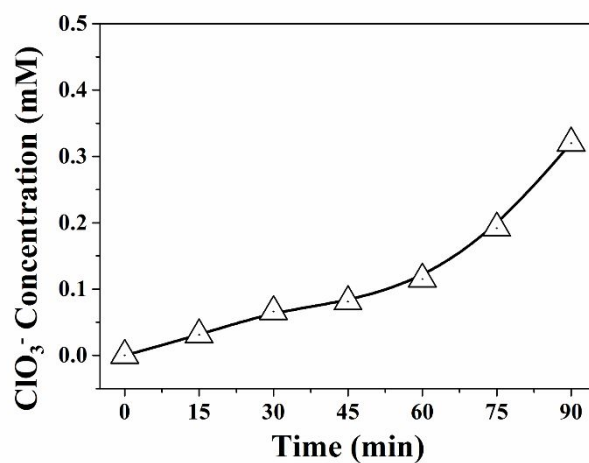

**Figure S16** Formation of chlorate as functions of reaction times. Condition: pH=5, 50 mM NaCl, 1.7 V vs Ag/AgCl.

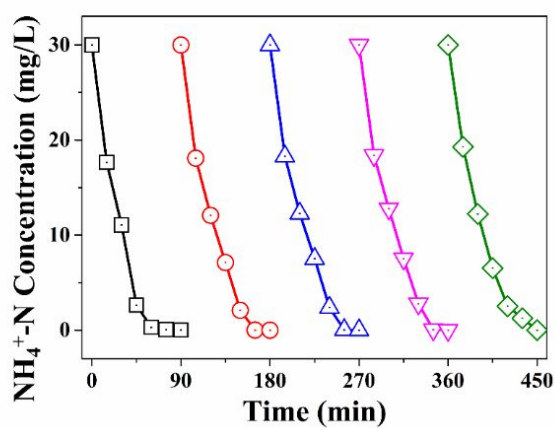

**Figure S17** NH<sub>4</sub><sup>+</sup>-N removal efficiency in Sb-SnO<sub>2</sub>/WO<sub>3</sub> system during five tests at 90 min intervals. Condition: NaCl 50 mM, pH=5, 1.7 V vs Ag/AgCl, 30 mg L<sup>-1</sup> NH<sub>4</sub><sup>+</sup>-N.

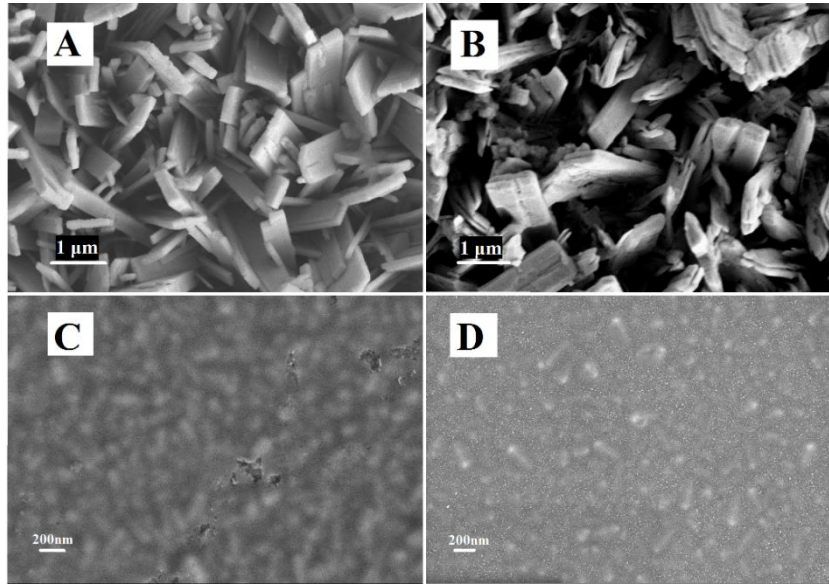

**Figure S18** SEM images of prepared WO<sub>3</sub> nanotubes (A) and the used WO<sub>3</sub> nanotubes after the repeated experiments (B), (C) SEM images of prepared Sb-SnO<sub>2</sub> coating and the used Sb-SnO<sub>2</sub> coating after the repeated experiments (D).

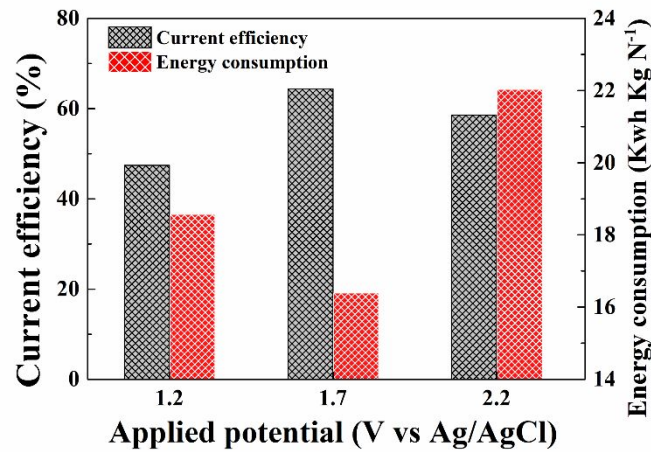

**Figure S19** Current efficiency and energy consumption as a function of potential in degrading NH<sub>4</sub><sup>+</sup>-N.

Current efficiency can be expressed as:

$$CE = \frac{n_i \times F \times (C_o - C_t) \times V}{M \times \int_0^t IAdt} \times 100\% \quad (S3)$$

where C<sub>o</sub> is the initial concentration of NH<sub>4</sub><sup>+</sup>-N, C<sub>t</sub> is the concentration of NH<sub>4</sub><sup>+</sup>-N at

reaction time  $t$  (s),  $V$  is the volume of the electrolyte (0.05 L),  $M$  is the molar mass of  $\text{NH}_4^+$  (14 g mol<sup>-1</sup>),  $I$  is the current density (A m<sup>-2</sup>),  $A$  is the effective area of the electrodes (0.0016 m<sup>2</sup>),  $F$  is the Faraday constant (96485.3 C mol<sup>-1</sup>) and  $n$  is the number of electrons needed for the oxidation of one mole of  $\text{NH}_4^+\text{-N}$  ( $n=3$ ). The prediction of required ammonia degradation time is obtained when  $\text{NH}_4^+\text{-N}$  concentration decreased below 1 mg L<sup>-1</sup>.

Energy consumption (kWh kg<sup>-1</sup> N) is calculated according to Eq. S4:

$$\text{EC} = \frac{\int_0^t UI A dt}{3.6 \times (C_o - C_t) \times V} \quad (\text{S4})$$

where  $I$  is the current of (A•m<sup>-2</sup>).

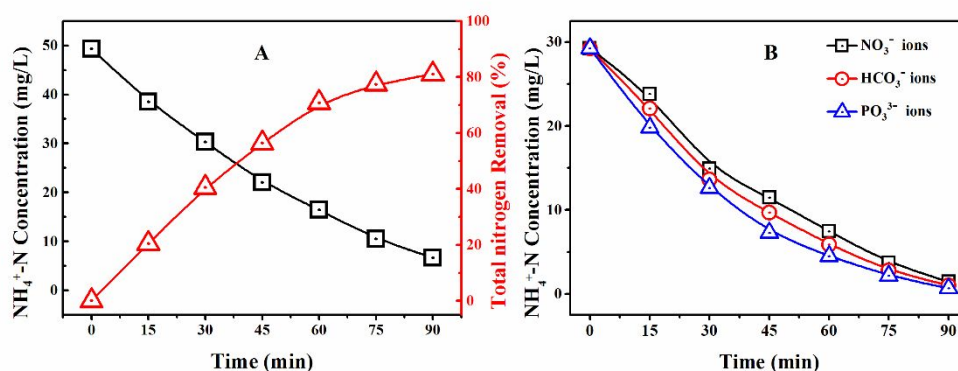

**Figure S20** (A) the trends of  $\text{NH}_4^+\text{-N}$  and TN removal efficiency of the  $\text{Sb-SnO}_2/\text{WO}_3$  degrading real wastewater after filtration. (B) Effects of bicarbonate, nitrate and phosphate ions on the degradation of  $\text{NH}_4^+\text{-N}$  in the  $\text{Sb-SnO}_2/\text{WO}_3$  system. Conditions: potential 1.7 V vs Ag/AgCl, NaCl 50 mM, 30 mg L<sup>-1</sup>  $\text{NH}_4^+\text{-N}$ , the concentration of bicarbonate, nitrate and phosphate ions is 2 mM.

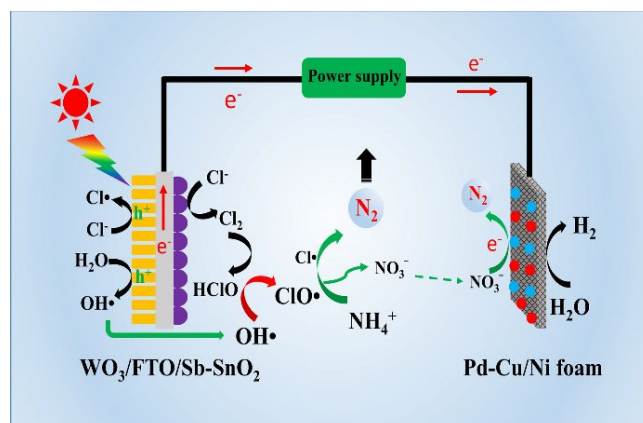

**Figure S21** Illustration of the nitrogen removal mechanism in the exhaustive denitrification system.

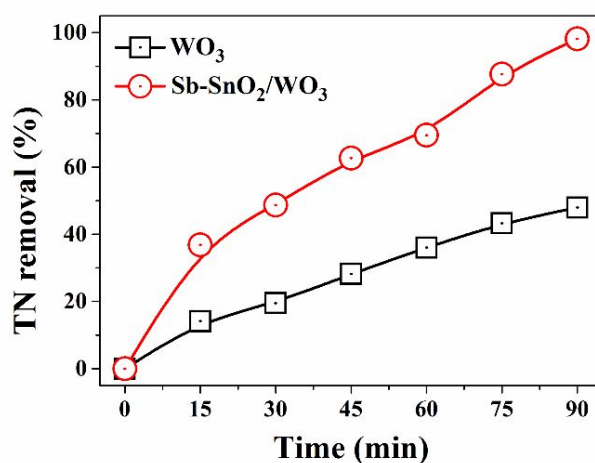

**Figure S22** The total nitrogen removal in the  $\text{Sb-SnO}_2/\text{WO}_3$  and  $\text{WO}_3$  electrode with  $\text{Pd-Cu/NF}$  as cathode. Condition:  $\text{NaCl}$  50 mM,  $\text{pH}=5$ , 1.7 V vs  $\text{Ag/AgCl}$ ,  $30 \text{ mg L}^{-1} \text{NH}_4^+\text{-N}$ .



**Table S1** Second-order rate constants of reaction in the model

| No. | Reaction                                                                              | Rate constant | References |
|-----|---------------------------------------------------------------------------------------|---------------|------------|
| R1  | $\text{H}^+ + \text{OH}^- \rightarrow \text{H}_2\text{O}$                             | 1.000E+11     | 1          |
| R2  | $\text{H}_2\text{O} \rightarrow \text{H}^+ + \text{OH}^-$                             | 1.000E+03     | 1          |
| R3  | $\text{OCl}^- + \text{H}^+ \rightarrow \text{HOCl}$                                   | 5.000E+10     | 1          |
| R4  | $\text{HOCl} \rightarrow \text{OCl}^- + \text{H}^+$                                   | 1.600E+03     | 1          |
| R5  | $\text{C}_2 + \text{H}_2\text{O} \rightarrow \text{Cl}_2\text{OH}^- + \text{H}^+$     | 1.500E+01     | 2          |
| R6  | $\text{Cl}^- + \text{HOCl} \rightarrow \text{Cl}_2\text{OH}^-$                        | 1.500E+04     | 2          |
| R7  | $\text{Cl}_2\text{OH}^- \rightarrow \text{HOCl} + \text{Cl}^-$                        | 5.500E+09     | 2          |
| R8  | $\text{HO}\cdot + \text{HO}\cdot \rightarrow \text{H}_2\text{O}_2$                    | 5.500E+09     | 3          |
| R9  | $\text{Cl}^- + \text{HO}\cdot \rightarrow \text{ClOH}\cdot^-$                         | 4.300E+09     | 3          |
| R10 | $\text{ClOH}\cdot^- \rightarrow \text{Cl}^- + \text{HO}\cdot$                         | 6.100E+09     | 3          |
| R11 | $\text{Cl}\cdot + \text{OH}^- \rightarrow \text{ClOH}\cdot^-$                         | 1.800E+10     | 3          |
| R12 | $\text{HO}\cdot + \text{HOCl} \rightarrow \text{ClO}\cdot + \text{H}_2\text{O}$       | 2.000E+09     | 4          |
| R13 | $\text{Cl}\cdot + \text{HOCl} \rightarrow \text{ClO}\cdot + \text{H}^+ + \text{Cl}^-$ | 3.000E+09     | 4          |
| R14 | $\text{ClOH}\cdot^- + \text{H}^+ \rightarrow \text{Cl}\cdot + \text{H}_2\text{O}$     | 2.100E+10     | 5          |
| R15 | $\text{ClOH}\cdot^- + \text{Cl}^- \rightarrow \text{Cl}_2\cdot^- + \text{OH}^-$       | 1.000E+05     | 4          |
| R16 | $\text{Cl}_2\cdot^- + \text{OH}^- \rightarrow \text{ClOH}\cdot^- + \text{Cl}^-$       | 4.500E+07     | 6          |
| R17 | $\text{Cl}_2\cdot^- \rightarrow \text{Cl}\cdot + \text{Cl}^-$                         | 1.100E+05     | 5          |
| R18 | $\text{Cl}\cdot + \text{Cl}\cdot \rightarrow \text{Cl}_2$                             | 1.000E+08     | 5          |
| R19 | $\text{Cl}\cdot + \text{Cl}_2\cdot^- \rightarrow \text{Cl}^- + \text{Cl}_2$           | 1.400E+09     | 5          |
| R20 | $\text{Cl}_2\cdot^- + \text{Cl}_2\cdot^- \rightarrow 2\text{Cl}^- + \text{Cl}_2$      | 8.300E+08     | 7          |
| R21 | $\text{Cl}_2\cdot^- + \text{HO}\cdot \rightarrow \text{HOCl} + \text{Cl}^-$           | 1.000E+09     | 7          |
| R22 | $\text{OH}\cdot + \text{DMOB} \rightarrow \text{Product 1}$                           | 1.800E+10     | 7          |
| R23 | $\text{Cl}\cdot + \text{DMOB} \rightarrow \text{Product 2}$                           | 2.000E+06     | 6          |
| R24 | $\text{ClO}\cdot + \text{DMOB} \rightarrow \text{Product 3}$                          | 4.000E+07     | 6          |

**Table S2** Rate constants of scavengers reacting with different radicals

|                               | HO•                                | Cl•                                | Cl <sub>2</sub> • <sup>-</sup>     | ClO•                               |
|-------------------------------|------------------------------------|------------------------------------|------------------------------------|------------------------------------|
|                               | (M <sup>-1</sup> s <sup>-1</sup> ) |
| TBA                           | 6.0 × 10 <sup>8</sup>              | 3.0 × 10 <sup>8</sup>              | 700                                |                                    |
| HCO <sub>3</sub> <sup>-</sup> | 8.5 × 10 <sup>6</sup>              | 2.2 × 10 <sup>8</sup>              | 8.0 × 10 <sup>7</sup>              | N.A.                               |

**Table S3** The main characteristics of the real wastewater.

| Parameters                            | Actual wastewater |
|---------------------------------------|-------------------|
| pH                                    | 7.2               |
| NH <sub>4</sub> <sup>+</sup> -N(mg/L) | 50                |
| NO <sub>3</sub> <sup>-</sup> -N(mg/L) | 15                |
| Cl <sup>-</sup> (mg/L)                | 132               |
| SO <sub>4</sub> <sup>2-</sup> (mg/L)  | 40                |
| COD(mg/L)                             | 500               |
| TN                                    | 70                |

## References

- (1) Matthew, B.; Anastasio, C., A chemical probe technique for the determination of reactive halogen species in aqueous solution: Part 1–bromide solutions. *Atmos. Chem. Phys.* **2006**, 6, (9), 2423-2437.
- (2) Wang, T. X.; Margerum, D. W., Kinetics of reversible chlorine hydrolysis: temperature dependence and general-acid/base-assisted mechanisms. *Inorganic Chemistry* **1994**, 33, (6), 1050-1055.
- (3) Grebel, J. E.; Pignatello, J. J.; Mitch, W. A., Effect of halide ions and carbonates on organic contaminant degradation by hydroxyl radical-based advanced oxidation processes in saline waters. *Environ. Sci. Technol.* **2010**, 44, (17), 6822-6828.
- (4) Hua, Z.; Guo, K.; Kong, X.; Lin, S.; Wu, Z.; Wang, L.; Huang, H.; Fang, J., PPCP degradation and DBP formation in the solar/free chlorine system: Effects of pH and dissolved oxygen. *Water Res.* **2019**, 150, 77-85.
- (5) Guo, K.; Wu, Z.; Shang, C.; Yao, B.; Hou, S.; Yang, X.; Song, W.; Fang, J., Radical Chemistry and Structural Relationships of PPCP Degradation by UV/Chlorine Treatment in Simulated Drinking Water. *Environ. Sci. Technol.* **2017**, 51, (18), 10431-10439.
- (6) Alfassi, Z. B.; Huie, R. E.; Mosseri, S.; Neta, P., Kinetics of one-electron oxidation by the ClO radical. *International Journal of Radiation Applications and Instrumentation. Part C. Radiation Physics and Chemistry* **1988**, 32, (1), 85-88.
- (7) Yang, Y.; Shin, J.; Jasper, J. T.; Hoffmann, M. R., Multilayer Heterojunction Anodes for Saline Wastewater Treatment: Design Strategies and Reactive Species Generation Mechanisms. *Environ. Sci. Technol.* **2016**, 50, (16), 8780-7.
